# Supplementary material for: A trend in prevalence of antimicrobial use and appropriateness of antimicrobial therapy in an acute care hospital from 2018 to 2019: repeated prevalence surveys in Japan
Source: PubMed Central journal article supplement (PMC6918669; doi:10.1186/s13104-019-4849-0), 2019-12-18
Supplement: 13104_2019_4849_MOESM1_ESM.pdf [file 13104_2019_4849_MOESM1_ESM.pdf]

**Table S1. Prevalence of Antimicrobial Drug Use According to Different Specialties According to the Survey Year.**

| <b>Specialty</b>               | <b>Number of patients</b> | <b>Prevalence, %</b> |
|--------------------------------|---------------------------|----------------------|
| Total                          |                           |                      |
| August 2018                    | 256                       | 28.5                 |
| August 2019                    | 275                       | 28.7                 |
| General surgery                |                           |                      |
| August 2018                    | 53                        | 30.2                 |
| August 2019                    | 35                        | 28.6                 |
| Orthopaedic surgery            |                           |                      |
| August 2018                    | 46                        | 17.4                 |
| August 2019                    | 42                        | 35.7                 |
| Neurosurgery                   |                           |                      |
| August 2018                    | 23                        | 30.4                 |
| August 2019                    | 34                        | 23.5                 |
| Gynaecology                    |                           |                      |
| August 2018                    | 4                         | 25.0                 |
| August 2019                    | 2                         | 50.0                 |
| Oral and maxillofacial surgery |                           |                      |
| August 2018                    | 13                        | 76.9                 |
| August 2019                    | 17                        | 41.2                 |
| Otorhinolaryngology            |                           |                      |
| August 2018                    | 5                         | 60.0                 |
| August 2019                    | 8                         | 87.5                 |
| Ophthalmology                  |                           |                      |
| August 2018                    | 0                         | NA                   |
| August 2019                    | 3                         | 100.0                |
| Urology                        |                           |                      |
| August 2018                    | 13                        | 23.1                 |
| August 2019                    | 14                        | 21.4                 |
| Dermatology                    |                           |                      |
| August 2018                    | 4                         | 25.0                 |
| August 2019                    | 2                         | 50.0                 |
| Internal medicine              |                           |                      |
| August 2018                    | 90                        | 23.3                 |

|                    |     |      |
|--------------------|-----|------|
| August 2019        | 108 | 19.4 |
| Paediatric surgery |     |      |
| August 2018        | 0   | NA   |
| August 2019        | 2   | 0.0  |
| Paediatrics        |     |      |
| August 2018        | 5   | 60.0 |
| August 2019        | 8   | 37.5 |

NA, not available.

**Table S2. The Reasons for Antimicrobial Drug Use According to Survey Year.**

| <b>Reasons</b>                 | <b>August 2018<br/>(n = 79)</b> | <b>August 2019<br/>(n = 87)</b> |
|--------------------------------|---------------------------------|---------------------------------|
| Treatment for infection, n (%) | 43 (54.4)                       | 51 (58.6)                       |
| Prophylaxis, n (%)             |                                 |                                 |
| Surgical                       | 28 (35.4)                       | 33 (37.9)                       |
| Medical                        | 5 (6.3)                         | 1 (1.1)                         |
| Noninfectious reasons, n (%)   | 1 (1.3)                         | 2 (2.3)                         |
| Unknown reasons, n (%)         | 2 (2.5)                         | 0 (0.0)                         |

**Table S3. Number and Type of Antimicrobial Drugs Given to Treat Infections According to the Survey Year.**

| Type                          | August 2018 <sup>a</sup> | August 2019 <sup>a</sup> |
|-------------------------------|--------------------------|--------------------------|
| Total antimicrobial drugs     | 43 (100.0)               | 51 (100.0)               |
| Ceftriaxone                   | 9 (20.9)                 | 15 (29.4)                |
| Cefmetazole                   | 7 (16.3)                 | 3 (5.9)                  |
| Cefazolin                     | 6 (14.0)                 | 0 (0.0)                  |
| Ampicillin-sulbactam          | 5 (11.6)                 | 3 (5.9)                  |
| Piperacillin-tazobactam       | 3 (7.0)                  | 4 (7.8)                  |
| Ceftazidime                   | 2 (4.7)                  | 0 (0.0)                  |
| Amoxicillin                   | 2 (4.7)                  | 1 (2.0)                  |
| Ampicillin                    | 1 (2.3)                  | 1 (2.0)                  |
| Amoxicillin-clavulanate       | 1 (2.3)                  | 0 (0.0)                  |
| Azithromycin                  | 1 (2.3)                  | 0 (0.0)                  |
| Cefditoren pivoxil            | 1 (2.3)                  | 3 (5.9)                  |
| Minocycline                   | 1 (2.3)                  | 1 (2.0)                  |
| Piperacillin                  | 1 (2.3)                  | 0 (0.0)                  |
| Vancomycin (parenteral)       | 1 (2.3)                  | 2 (3.9)                  |
| Trimethoprim-sulfamethoxazole | 1 (2.3)                  | 1 (2.0)                  |
| Cefalexin                     | 1 (2.3)                  | 0 (0.0)                  |
| Cefozopran                    | 0 (0.0)                  | 3 (5.9)                  |
| Cefotaxime                    | 0 (0.0)                  | 3 (5.9)                  |
| Metronidazole (parenteral)    | 0 (0.0)                  | 2 (3.9)                  |
| Levofloxacin                  | 0 (0.0)                  | 2 (3.9)                  |
| Clindamycin                   | 0 (0.0)                  | 2 (3.9)                  |
| Acyclovir                     | 0 (0.0)                  | 1 (2.0)                  |
| Amphotericin B (enteral)      | 0 (0.0)                  | 1 (2.0)                  |
| Gentamicin                    | 0 (0.0)                  | 1 (2.0)                  |
| Metronidazole (enteral)       | 0 (0.0)                  | 1 (2.0)                  |
| Valacyclovir                  | 0 (0.0)                  | 1 (2.0)                  |

<sup>a</sup>Data are expressed as numbers (percentages).

**Table S4. Infection Sites for Which Patients Received Antimicrobial Therapy According to the Survey Year.**

| Infection site <sup>a</sup>      | August 2018 <sup>b</sup>           |                                       | August 2019 <sup>b</sup>           |                                       |
|----------------------------------|------------------------------------|---------------------------------------|------------------------------------|---------------------------------------|
|                                  | Number of drugs, n (%)<br>(n = 43) | Number of patients, n (%)<br>(n = 40) | Number of drugs, n (%)<br>(n = 51) | Number of patients, n (%)<br>(n = 44) |
| Hepatobiliary system             | 10 (23.3)                          | 10 (25.0)                             | 2 (3.9)                            | 2 (4.5)                               |
| Bloodstream                      | 9 (20.9)                           | 9 (22.5)                              | 6 (11.8)                           | 6 (13.6)                              |
| Urinary tract                    | 8 (18.6)                           | 7 (17.5)                              | 9 (17.6)                           | 9 (20.5)                              |
| Skin and soft tissue             | 7 (16.3)                           | 6 (15.0)                              | 5 (9.8)                            | 5 (11.4)                              |
| Eye, ear, nose, throat, or mouth | 5 (11.6)                           | 5 (12.5)                              | 4 (7.8)                            | 3 (6.8)                               |
| Lower respiratory tract          | 4 (9.3)                            | 3 (7.5)                               | 9 (17.6)                           | 9 (20.5)                              |
| Intra-abdominal                  | 3 (7.0)                            | 3 (7.5)                               | 0 (0.0)                            | 0 (0.0)                               |
| Gastrointestinal tract           | 3 (7.0)                            | 3 (7.5)                               | 6 (11.8)                           | 4 (9.1)                               |
| Empirical/undetermined           | 1 (2.3)                            | 1 (2.5)                               | 1 (2.0)                            | 1 (2.3)                               |
| Bone and joint                   | 2 (4.7)                            | 2 (5.0)                               | 6 (11.8)                           | 5 (11.4)                              |
| Central nervous system           | 2 (4.7)                            | 2 (5.0)                               | 5 (9.8)                            | 2 (4.5)                               |
| Others                           | 0 (0.0)                            | 0 (0.0)                               | 1 (2.0)                            | 1 (2.3)                               |

<sup>a</sup>Antimicrobial drugs and patients could be given for more than one infection site.

<sup>b</sup>Data are expressed as numbers (percentages).

**Table S5. Appropriateness of the Antimicrobial Drugs Used for Treatment According to the Location in the Hospital, Specialty, Type of Antimicrobial Drug, and Type of Infection.**

|                            | August 2018 <sup>a</sup> |                              | August 2019 <sup>a</sup> |                              |
|----------------------------|--------------------------|------------------------------|--------------------------|------------------------------|
|                            | Total number of uses     | Number of inappropriate uses | Total number of uses     | Number of inappropriate uses |
| Location in hospital       |                          |                              |                          |                              |
| Ward                       | 41                       | 15 (36.6)                    | 51                       | 30 (58.8)                    |
| Critical care unit         | 2                        | 2 (100.0)                    | 0                        | NA                           |
| Specialty                  |                          |                              |                          |                              |
| Internal medicine          | 17                       | 0 (0.0)                      | 19                       | 8 (42.1)                     |
| General surgery            | 8                        | 6 (75.0)                     | 4                        | 3 (75.0)                     |
| Neurosurgery               | 4                        | 4 (100.0)                    | 7                        | 5 (71.4)                     |
| Orthopaedic surgery        | 1                        | 1 (100.0)                    | 6                        | 4 (66.7)                     |
| Otorhinolaryngology        | 1                        | 0 (0.0)                      | 5                        | 2 (40.0)                     |
| Others                     | 12                       | 6 (50.0)                     | 10                       | 8 (80.0)                     |
| Type of antimicrobial drug |                          |                              |                          |                              |
| Ceftriaxone                | 9                        | 4 (44.4)                     | 15                       | 7 (46.7)                     |
| Cefmetazole                | 7                        | 2 (28.6)                     | 3                        | 1 (33.3)                     |
| Cefazolin                  | 6                        | 1 (16.7)                     | 0                        | NA                           |
| Ampicillin-sulbactam       | 5                        | 4 (80.0)                     | 3                        | 2 (66.7)                     |
| Others                     | 16                       | 6 (37.5)                     | 30                       | 20 (66.7)                    |
| Site of infection          |                          |                              |                          |                              |
| Hepatobiliary system       | 10                       | 2 (20.0)                     | 2                        | 0 (0.0)                      |
| Bloodstream                | 9                        | 1 (11.1)                     | 5                        | 2 (40.0)                     |
| Urinary tract              | 8                        | 2 (25.0)                     | 9                        | 6 (66.7)                     |
| Skin and soft issue        | 5                        | 2 (40.0)                     | 5                        | 5 (100.0)                    |
| Lower respiratory tract    | 4                        | 2 (50.0)                     | 8                        | 5 (62.5)                     |
| Bone and joint             | 2                        | 0 (0.0)                      | 6                        | 4 (66.7)                     |
| Gastrointestinal tract     | 2                        | 2 (100.0)                    | 6                        | 1 (16.7)                     |

<sup>a</sup>Data are expressed as numbers (percentages).

NA, not available.

**Table S6. Type and Duration of Antimicrobial Drug Used for Surgical Prophylaxis According to the Survey Year.**

|                                          | <b>August 2018<sup>a</sup></b><br><b>(n = 28)</b> | <b>August 2019<sup>a</sup></b><br><b>(n = 33)</b> |
|------------------------------------------|---------------------------------------------------|---------------------------------------------------|
| Duration                                 |                                                   |                                                   |
| Mean days (SD)                           | 2.5 (1.3)                                         | 1.8 (1.1)                                         |
| Median days (IQR)                        | 2 (2 – 3)                                         | 2 (1 – 2)                                         |
| One day                                  | 4 (14.3)                                          | 16 (48.5)                                         |
| Two days                                 | 11 (39.3)                                         | 11 (33.3)                                         |
| More than two days                       | 13 (46.4)                                         | 6 (18.2)                                          |
| Type of antimicrobial drugs <sup>b</sup> |                                                   |                                                   |
| Cefazolin                                | 13 (46.4)                                         | 0 (0.0)                                           |
| Ampicillin-sulbactam                     | 7 (25.0)                                          | 3 (9.1)                                           |
| Cefotiam                                 | 3 (10.7)                                          | 0 (0.0)                                           |
| Cefmetazole                              | 2 (7.1)                                           | 4 (12.1)                                          |
| Ceftriaxone                              | 1 (3.6)                                           | 10 (30.3)                                         |
| Cefcapene pivoxil                        | 1 (3.6)                                           | 1 (3.0)                                           |
| Amoxicillin                              | 1 (3.6)                                           | 0 (0.0)                                           |
| Flomoxef                                 | 0 (0.0)                                           | 5 (15.2)                                          |
| Ampicillin                               | 0 (0.0)                                           | 5 (15.2)                                          |
| Cefalexin                                | 0 (0.0)                                           | 4 (12.1)                                          |
| Cefoperazone-sulbactam                   | 0 (0.0)                                           | 1 (3.0)                                           |

<sup>a</sup>Data are expressed as numbers (percentages).

<sup>b</sup>A total of 28 and 33 antimicrobial drugs were given to 28 and 32 patients for surgical prophylaxis in August 2018 and 2019, respectively.

IQR, interquartile range; SD, standard deviation.
